# Supplementary material for: Effect of cerous phosphates with different crystal structures on their acidity and catalytic activity for the dehydration of glucose into 5-(hydroxymethyl)furfural
Source: Royal Society of Chemistry journal article supplement (doi:10.1039/c6ra02602h), 2016-01-01
Supplement: c6ra02602h1.pdf [file c6ra02602h1.pdf]

## Supplementary Information

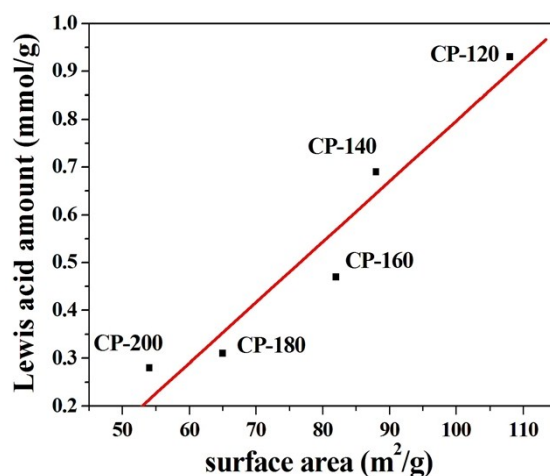

Fig. S1 plot of Lewis acid amount versus surface area for the CP catalysts

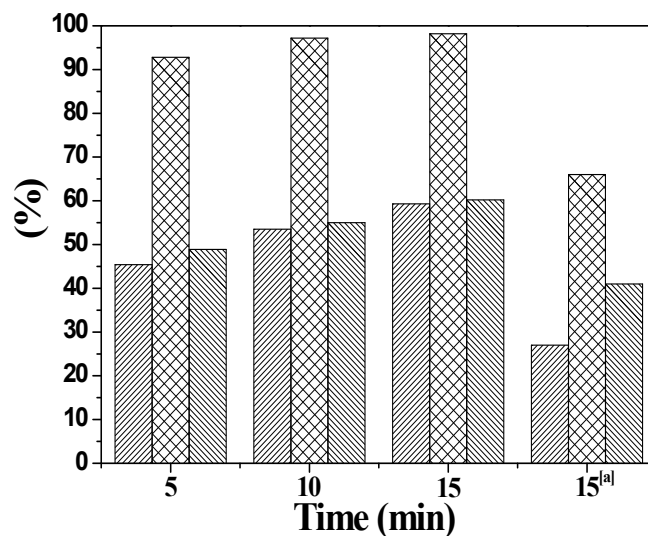

Fig. S2 effect of reaction time on the dehydration of fructose over CP120 (▨ HMF yield, ▩ glucose conversion, ▧ HMF selectivity; Reaction conditions: fructose: 200 mg, catalyst: 50 mg, solvent: 10 ml DMSO, temperature: 160 °C, [a]: the dehydration of glucose, the other reaction conditions are the same as the dehydration of fructose, ▩ glucose conversion)

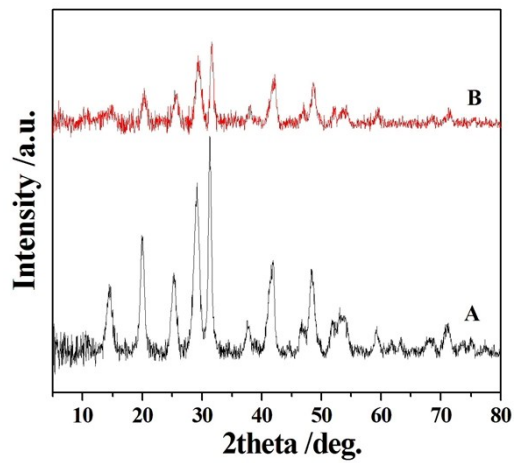

Fig. S3 XRD patterns of A: CP120 and B: CP120-used-1
